# Supplementary material for: AIE active triphenylamine–benzothiazole based motifs: ESIPT or ICT emission
Source: Royal Society of Chemistry journal article supplement (doi:10.1039/c6ra02417c), 2016-01-01
Supplement: c6ra02417c1.pdf [file c6ra02417c1.pdf]

## Supporting Information

### AIE Active Triphenylamine –Benzothiazole Based Motifs: ESIPT or ICT Emission

Vikas S. Padalkar\*, Daisuke Sakamaki, Kenji Kuwada, Norimitsu Tohnai, Tomoyuki Akutagawa, Ken-ichi Sakai, and Shu Seki\*

---

**Table S1.** Optical properties of compounds **8** and **9** in THF and THF–water mixture

Details of Steady State Measurement

**Fig S1.** Steady state absorption spectra of compounds **8** (left) and **9** (right) in different solvents ( $10^{-5}$  M concentration) at room temperature

**Fig S2.** Steady state emission spectra of compounds **8** and **9** in solid state (spin coated, 1 wt %) at room temperature

**Fig S3.** Day light and UV light images of compound **9** at various amount of TFA ( $10^{-5}$  M concentration of **9**, room temperature)

**Fig S4.** Absorption (left) and emission (right) spectra of mixture of compound **9** and various amount of DDQ ( $10^{-5}$  M concentration, room temperature, DDQ amount (eq))

**Fig S5.** Normalised emission spectra of compounds **8** and **9** in solid state (spin coated, 1 wt %) at room temperature

**Fig S6.** Steady state absorption spectra of compounds **8** (left) and **9** (right) in THF and THF–water mixture ( $10^{-5}$  M concentration, room temperature, water fraction (vol%))

**Fig S7.** Powder X-ray data of compounds **8** and **9** on quartz film

**Fig S8.** Two DSC cooling and heating cycles for **8** and **9**

**Fig S9.** Optimized geometries of compounds **8** and **9** respectively (hydrogen atoms are omitted for celerity).

**Fig S10:** Mullikan Charges of all atoms for compounds **8** and **9** respectively

**Scheme S1:** Protonated form of compound **9** in acidic condition

**Fig S11-S14.** NMR spectra of compounds **8** and **9**

**Table S1.** Optical properties of compounds **8** and **9** in THF and THF–water mixture

| Comp     | Medium<br>Water:<br>THF       | 0:100      | 10:90      | 20:80      | 30:70      | 40:60      | 50:50      | 60:40      | 70:30      | 80:20      | 90:10      | 95:05      |
|----------|-------------------------------|------------|------------|------------|------------|------------|------------|------------|------------|------------|------------|------------|
| <b>8</b> | $\lambda_{max}^{Abs}$<br>(nm) | 302<br>389 | 302<br>389 | 302<br>389 | 303<br>389 | 303<br>389 | 302<br>390 | 302<br>390 | 410        | 398        | 307<br>404 | 403        |
|          | $\lambda_{max}^{Em}$<br>(nm)  | 478        | 497        | 501        | 505        | 508        | 510        | 516        | 493        | 482        | 484        | 484        |
| <b>9</b> | $\lambda_{max}^{Abs}$<br>(nm) | 297<br>394 | 299<br>392 | 299<br>391 | 285<br>391 | 297<br>391 | 295<br>391 | 295<br>391 | 301<br>414 | 282<br>401 | 295<br>402 | 299<br>406 |
|          | $\lambda_{max}^{Em}$<br>(nm)  | 483        | 498        | 501        | 504        | 505        | 508        | 511        | 492        | 484        | 480        | 484        |

Measured from  $10^{-5}$  M solution;  $\lambda_{ex}$ : 380 nm for fluorescence measurement at room temperature.

## Details of Steady State Measurement

The steady state measurements were performed in solution and in solid state. Non-polar, polar-protic and polar-aprotic solvents were used for absorption and emission study. All spectroscopic measurements were carried out at room temperature (20 °C). Concentrations used for the measurement was  $10^{-5}$  M in solution. Solid samples were prepared on quartz plate by spin-casting of dichloromethane compounds solution.  $\lambda_{max}^{Abs}$ : Absorption maxima presented in nm.

$\lambda_{max}^{Em}$ : Emission maxima presented in nm; Excitation wavelength used was absorption maxima of compounds in respective solvents for fluorescence measurement unless stated. Quinine sulphate was used as standard for relative quantum yields evaluations.

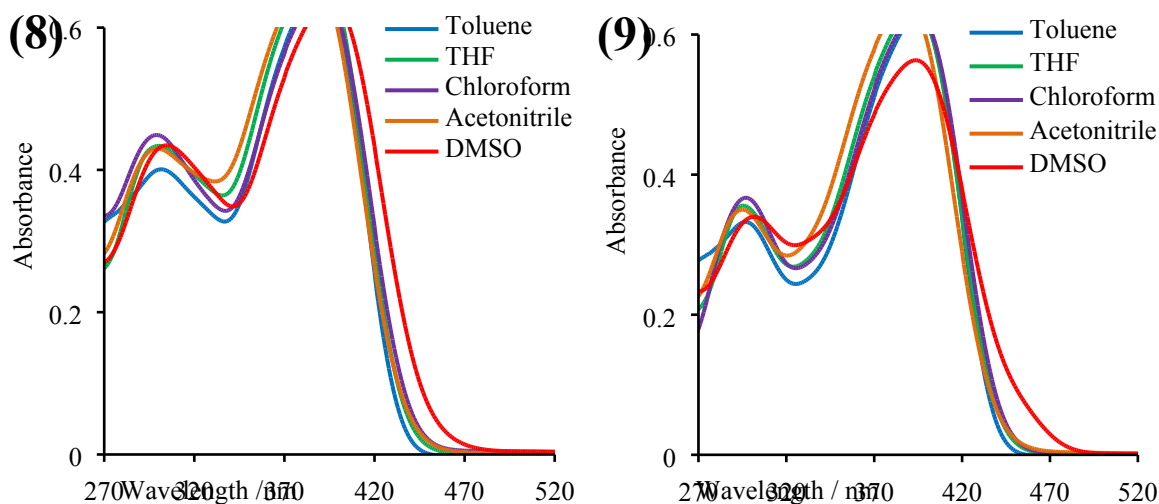

**Fig S1.** Steady state absorption spectra of compounds **8** (left) and **9** (right) in different solvents ( $10^{-5}$  M concentration) at room temperature

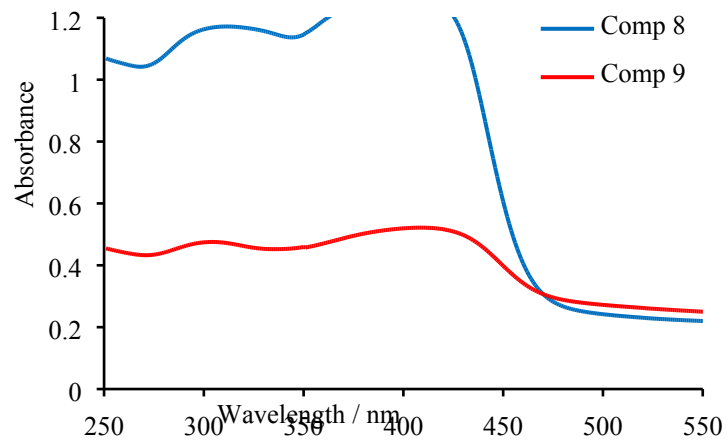

**Fig S2.** Steady state absorption spectra of compounds **8** and **9** in solid state (spin coated, 1 wt %) at room temperature

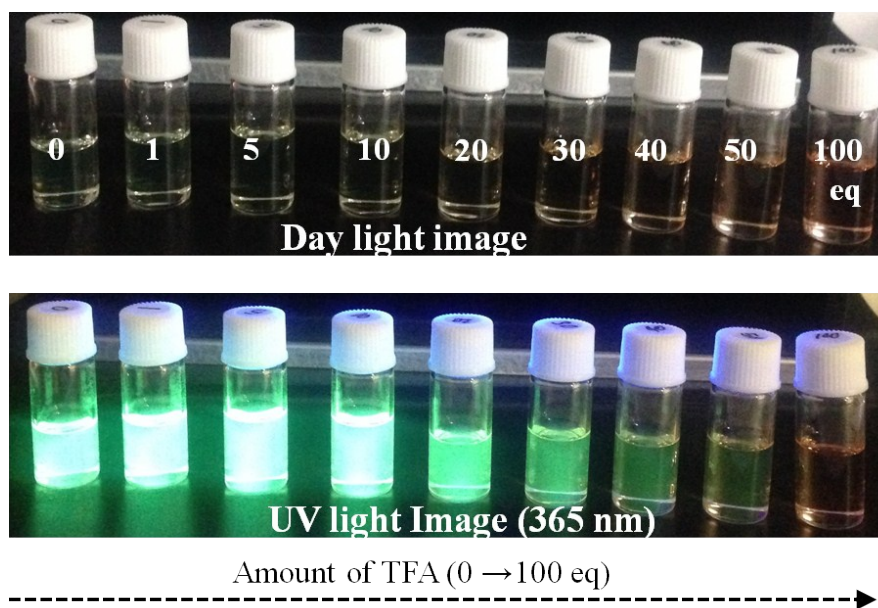

**Fig S3.** Day light and UV light images of compound **9** at various amount of TFA ( $10^{-5}$  M concentration of **9** and different eq. of TFA at room temperature)

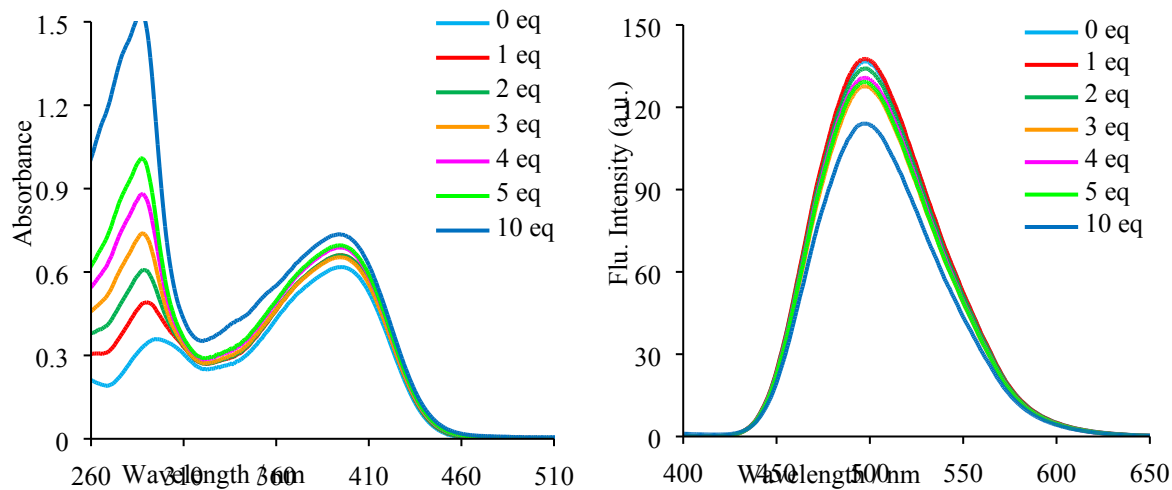

**Fig S4.** Absorption (left) and emission (right) spectra of mixture of compound **9** and various amount of DDQ ( $10^{-5}$  M concentration, room temperature, DDQ amount (eq))

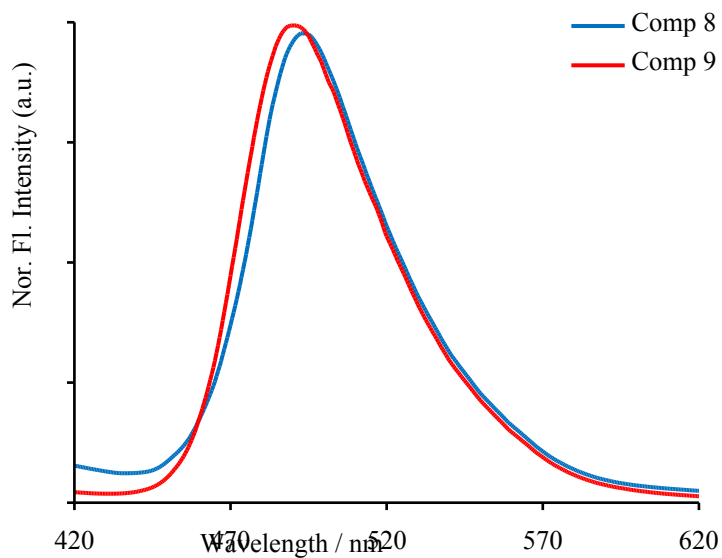

**Fig S5.** Normalised emission spectra of compounds **8** and **9** in solid state (spin coated, 1 wt %) at room temperature

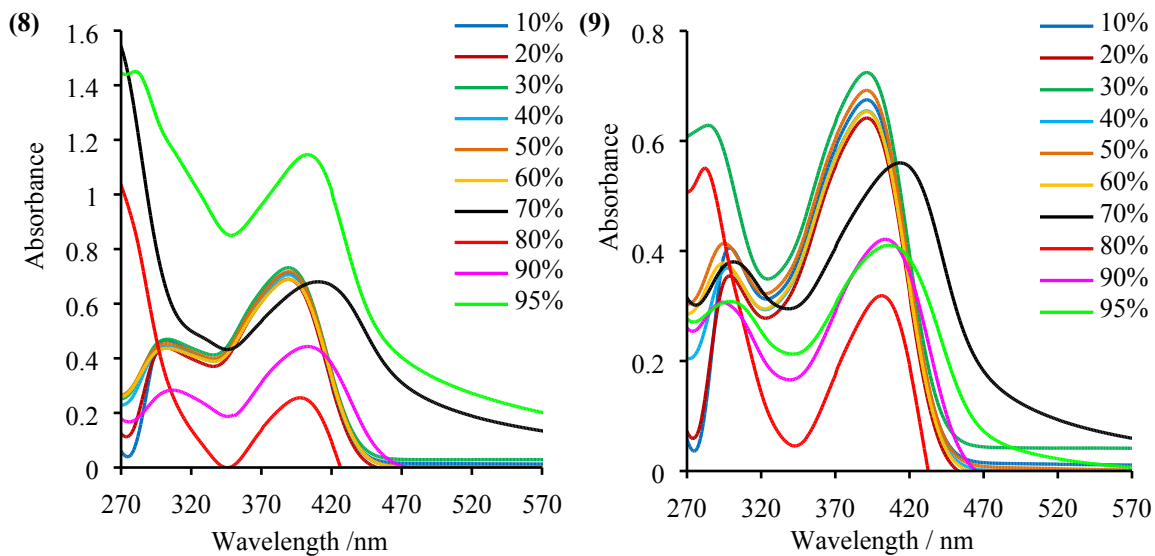

**Fig S6.** Steady state absorption spectra of compounds **8** (left) and **9** (right) in THF and THF–water mixture ( $10^{-5}$  M concentration, room temperature, water fraction (vol%))

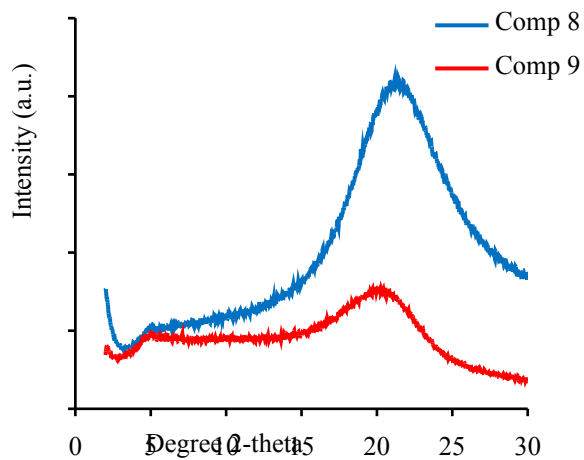

**Fig S7.** Powder X-ray data of compounds **8** and **9** on quartz film

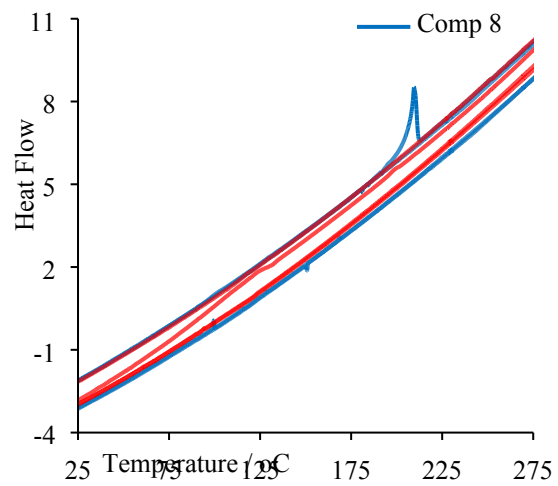

**Fig S8.** Two DSC cooling and heating cycles for **8** and **9**

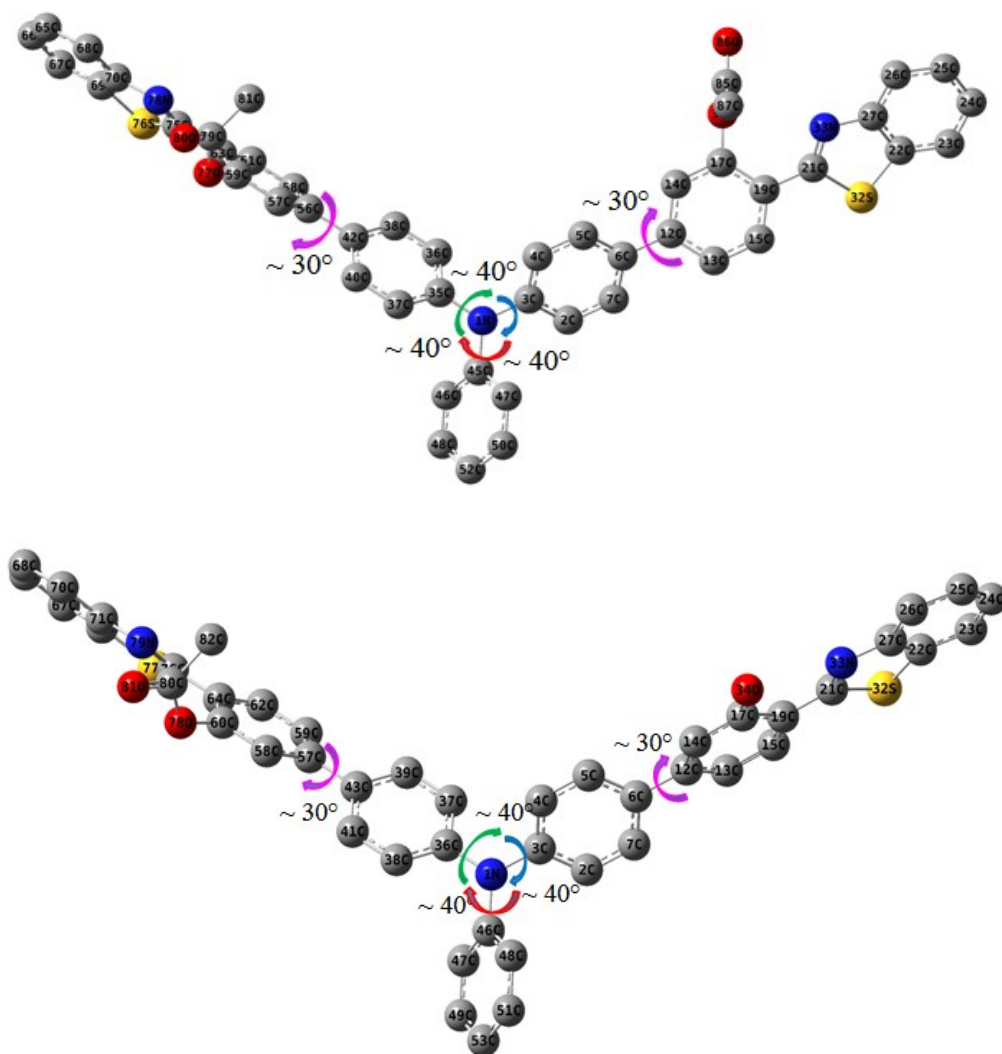

**Fig S9.** Optimized geometries of compounds **8** and **9** respectively (hydrogen atoms are omitted for clarity).



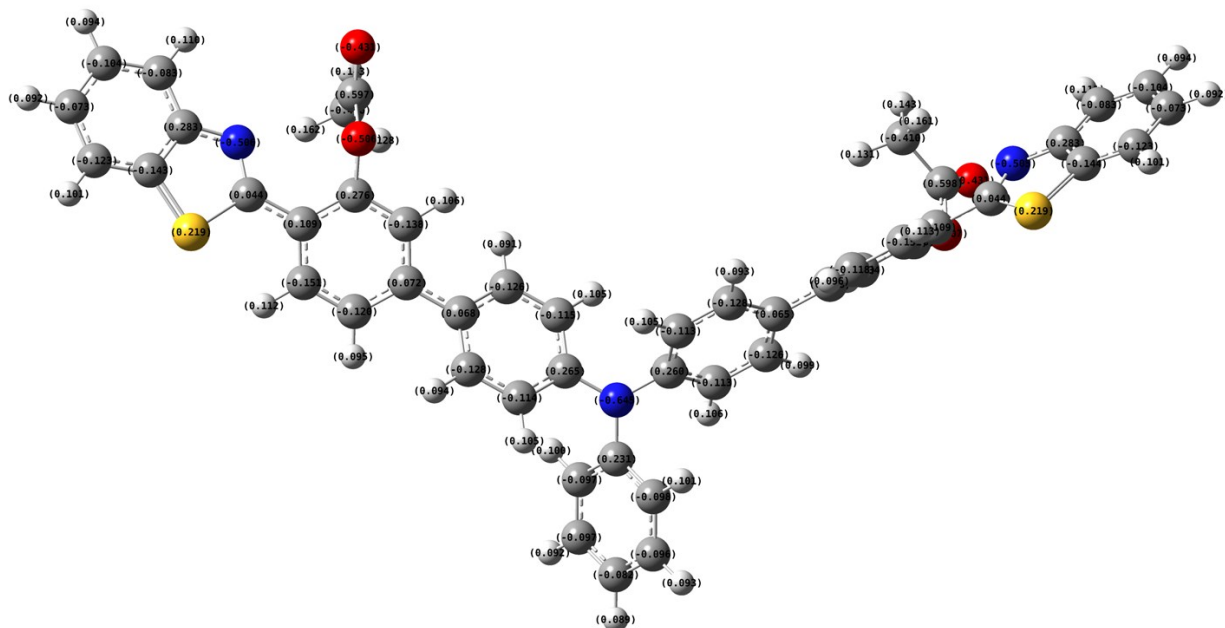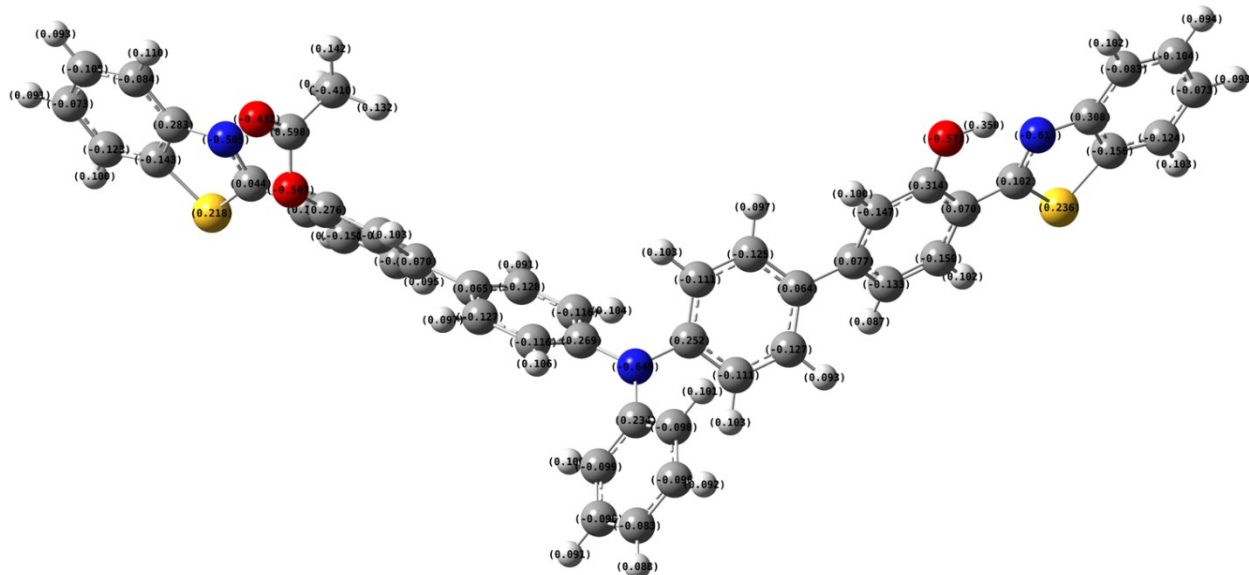

**Fig S10:** Mulliken charges of all atoms for compounds **8** and **9** respectively

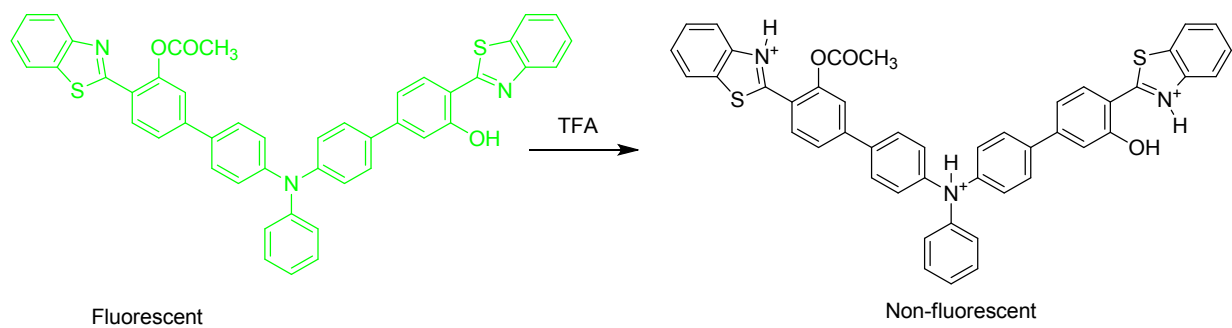

**Scheme S1:** Protonated form of compound **9** in acidic condition

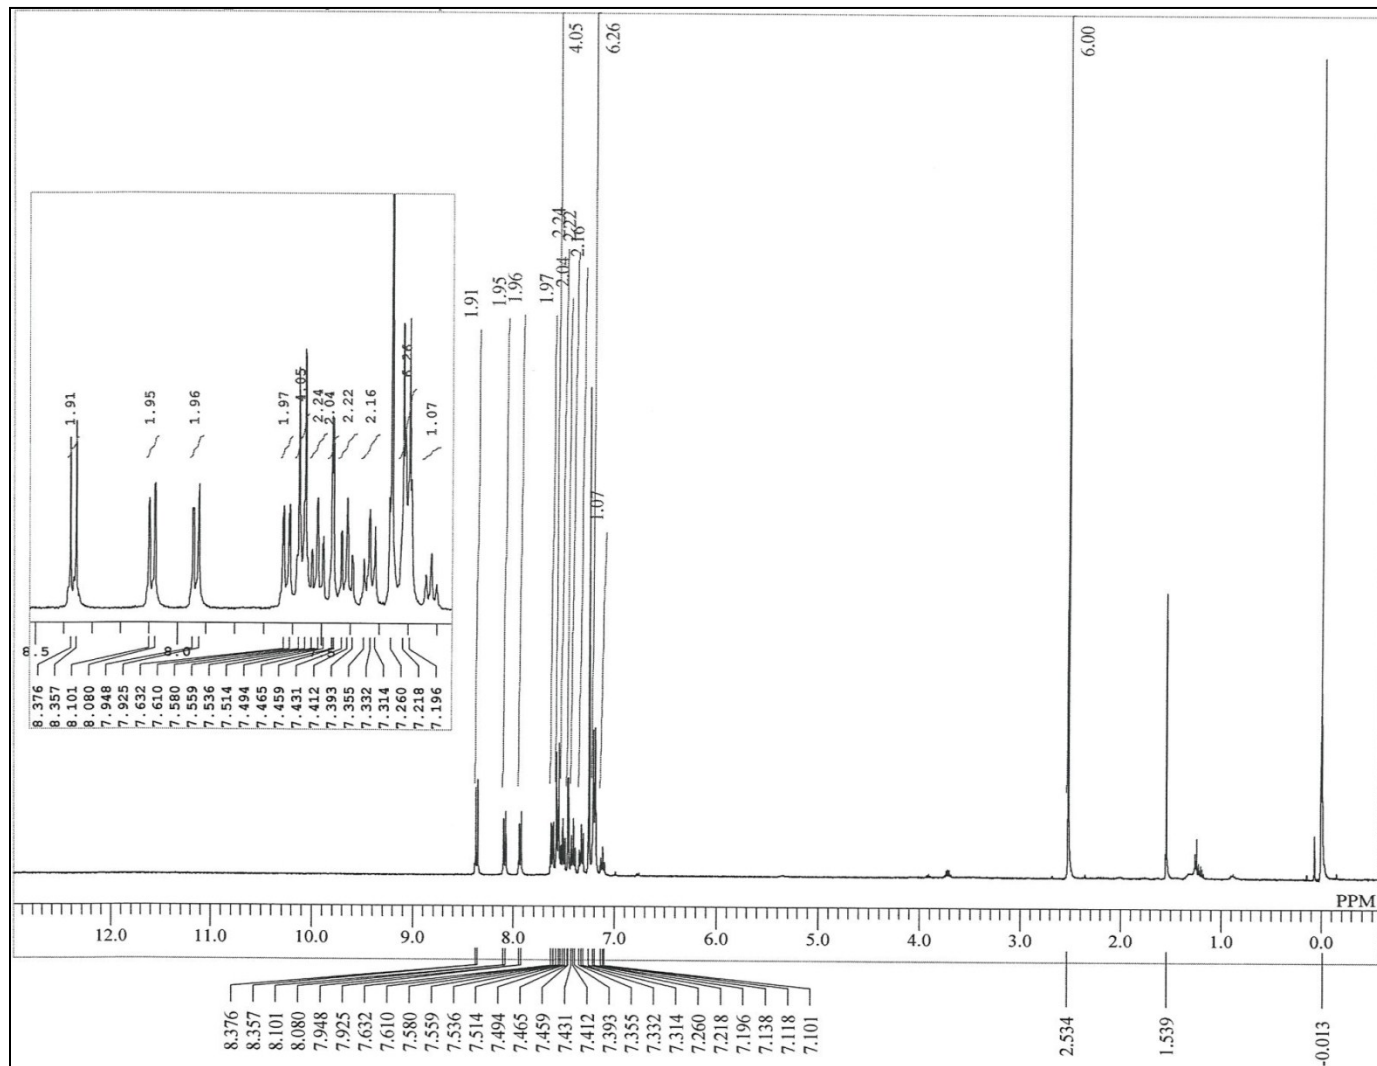

**Fig S11.**  $^1\text{H-NMR}$  spectrum of compound **8**

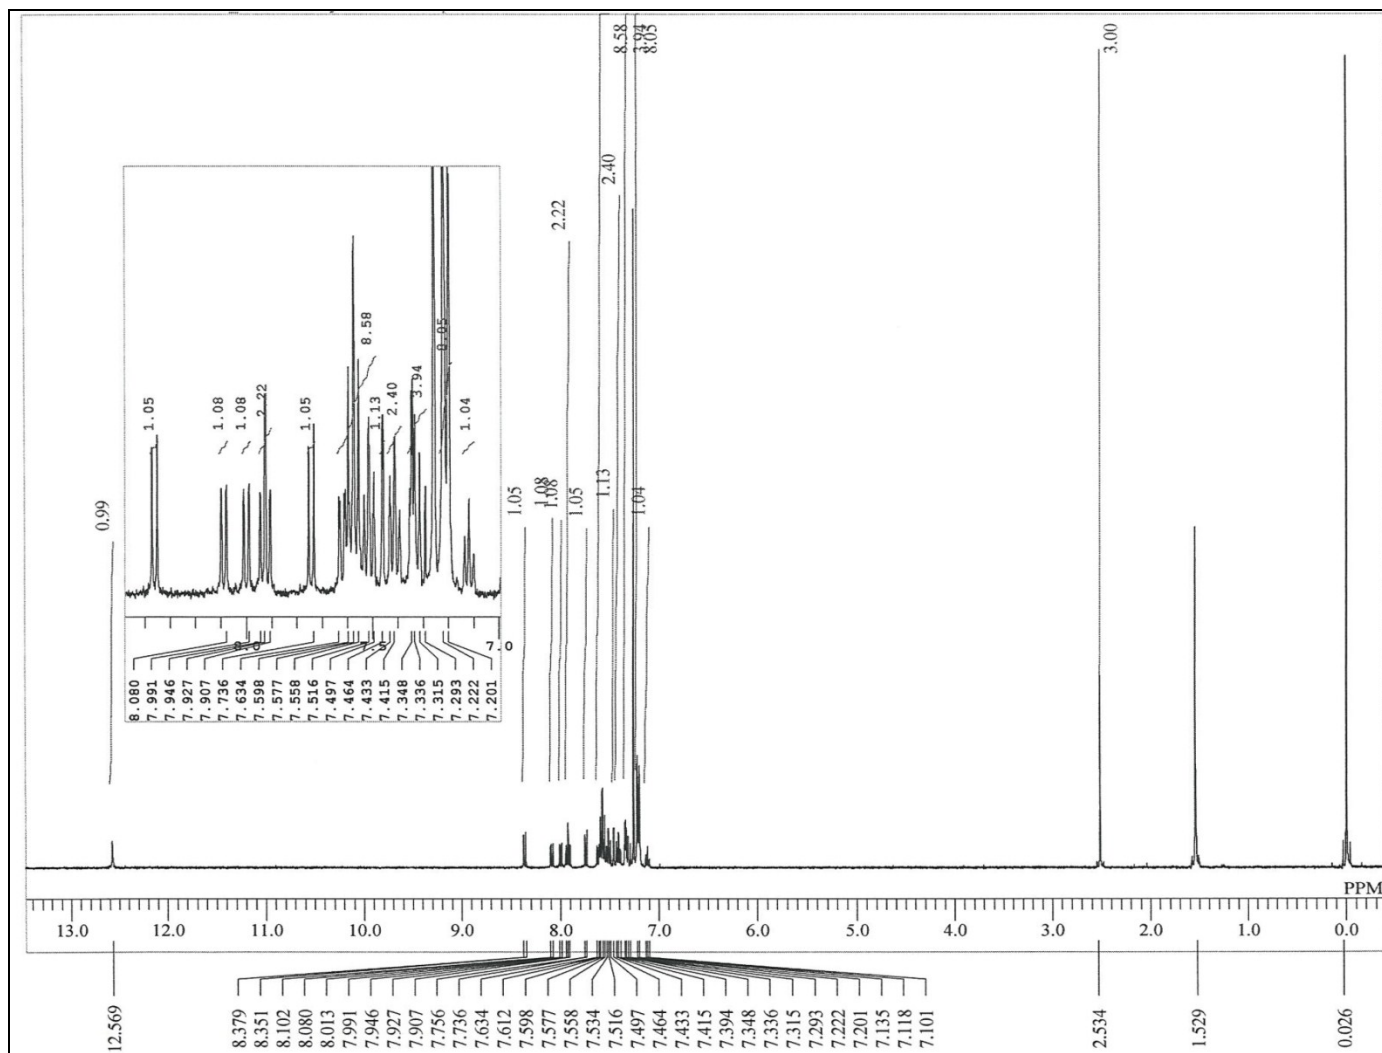

Fig S12. <sup>1</sup>H-NMR spectrum of compound 9

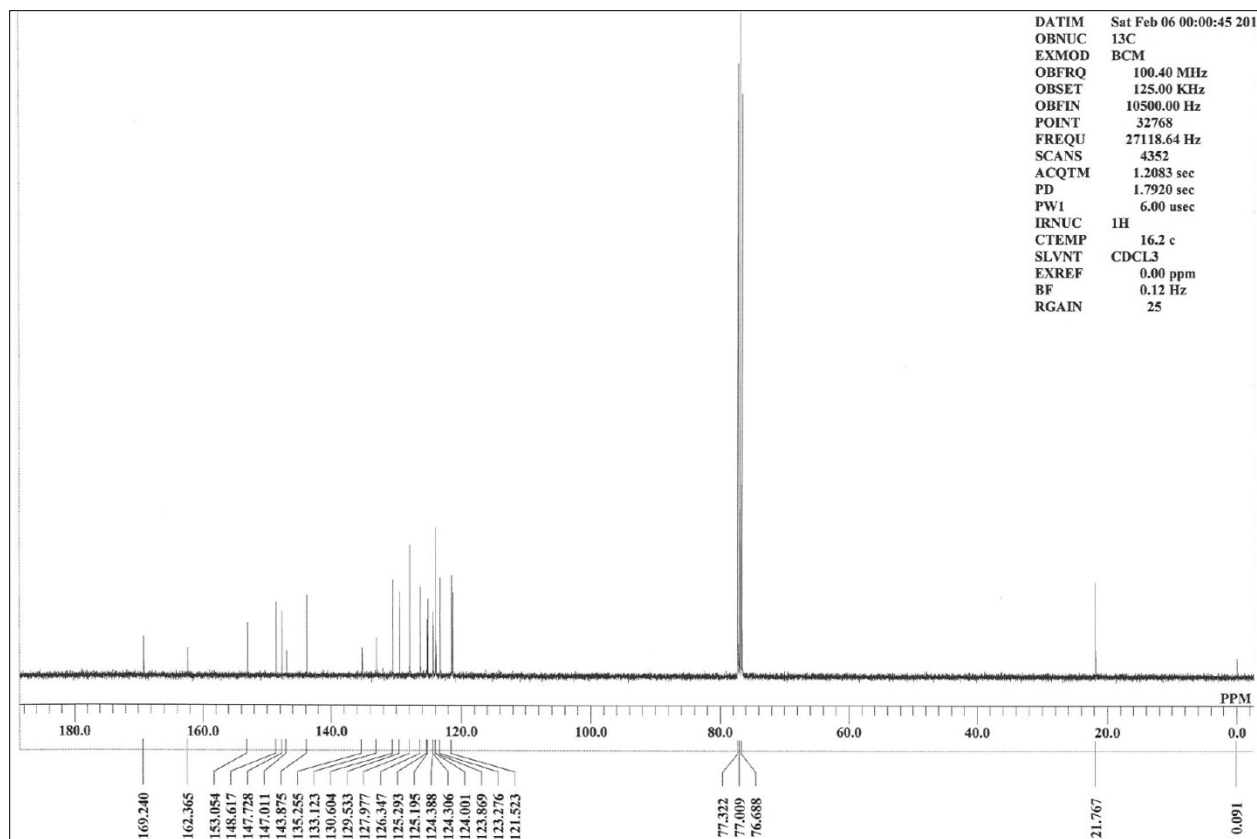

**Fig S13.**  $^{13}\text{C}$ -NMR spectrum of compound **8**

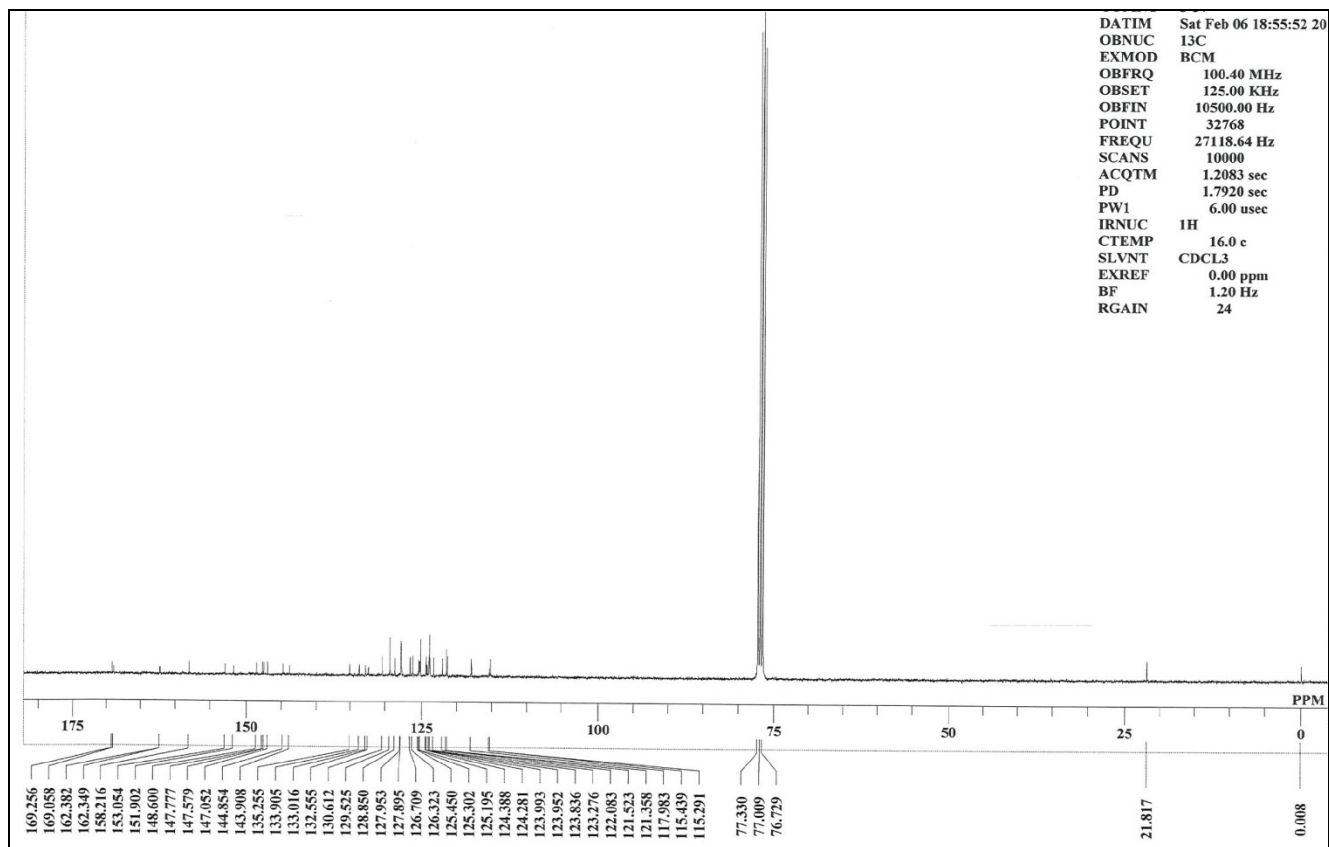

**Fig S14.**  $^{13}\text{C}$ -NMR spectrum of compound **9**
